# Supplementary material
Source: publisher figshare collection journal article supplement (https://frontiersin.figshare.com/ndownloader/files/15142658)
Supplement: Supplementary file 1 [file 15142658]

Supplementary materials

Table S1. Linkage disequilibrium between loci in the two rectangle plots and in the population with random sample.

| Locus | Rectangle plot | | Random sample | |
| --- | --- | --- | --- | --- |
| P value (XLW) | P value (YLG) | P value (XLW) | P value (YLG) |
| HO2 X HO3 | 0.22414 | NA | 0.68131 | 0.02253 |
| HO2 X HO5 | 0 | 0.76004 | 0.81758 | 0.00141 |
| HO2 X HO8 | 0 | 0.54018 | 0.2446 | 0.05331 |
| HO2 X HO20 | 0 | NA | 0.15576 | 0.01713 |
| HO2 X HO36 | 0 | 0.12139 | 0.43376 | 0.03214 |
| HO2 X HO48 | 0 | 0.1888 | 0.79379 | 0.67875 |
| HO2 X HO51 | 0 | 0.00704 | 0.82171 | 0.00693 |
| HO3 X HO5 | 0.00005 | NA | 0.51386 | 0.70477 |
| HO3 X HO8 | 0.66107 | NA | 0.8382 | 0.87945 |
| HO3 X HO20 | 0.00041 | NA | 0.95548 | 0.12919 |
| HO3 X HO36 | 0.00241 | NA | 0.12433 | 0.31312 |
| HO3 X HO48 | 0.78034 | NA | 0.16769 | 0.81033 |
| HO3 X HO51 | 0 | NA | 0.26859 | 0.13000 |
| HO5 X HO8 | 0 | 0.39994 | 0.39046 | 0.02395 |
| HO5 X HO20 | 0 | NA | 0.18251 | 0.03752 |
| HO5 X HO36 | 0 | 0.82909 | 0.14301 | 0.00764 |
| HO5 X HO48 | 0.04471 | 0.76119 | 0.27088 | 0.43554 |
| HO5 X HO51 | 0 | 0.58458 | 0.22404 | 0.00074 |
| HO8 X HO20 | 0 | NA | 0.25533 | 0.05601 |
| HO8 X HO36 | 0 | 0.2291 | 0.58344 | 0.02109 |
| HO8 X HO48 | 0 | 0.00023 | 0.6439 | 0.64186 |
| HO8 X HO51 | 0 | 0 | 0.90952 | 0.01478 |
| HO20 X HO36 | 0 | NA | 0.15861 | 0.06764 |
| HO20 X HO48 | 0.00003 | NA | 0.44122 | 0.38866 |
| HO20 X HO51 | 0 | NA | 0.39291 | 0.00027 |
| HO36 X HO48 | 0.00244 | 0.70917 | 0.71626 | 0.27983 |
| HO36 X HO51 | 0 | 0 | 0.05102 | 0.00221 |
| HO48 X HO51 | 0.00008 | 0 | 0.07159 | 0.12513 |

based on 280000 permutations.

Adjusted P-value for 5% nominal level is : 0.000179

Adjusted P-value for 1% nominal level is :0.000036

Adjusted P-value for 0.1% nominal level is :0.000004

Table S2. Significance of *P*sex of the two populations.

| MLG | *n* | *P*sex | MLG | *n* | *P*sex |
| --- | --- | --- | --- | --- | --- |
| XLW |  |  | YLG |  |  |
| XLW-MLL01 | 2 | 1.47E-10* | YLG-MLL01 | 2 | 5.16E-05 * |
| XLW-MLL02 | 2 | 1.67E-15*** | YLG-MLL02 | 4 | 6.07E-08 *** |
| XLW-MLL03 | 3 | 0.00*** | YLG-MLL03 | 3 | 2.06E-08 *** |
| XLW-MLL04 | 2 | 1.49E-11** | YLG-MLL04 | 2 | 3.24E-05 * |
| XLW-MLL05 | 2 | 3.73E-08ns | YLG-MLL05 | 2 | 5.98E-06 ** |
| XLW-MLL06 | 3 | 4.13E-12** | YLG-MLL06 | 7 | 6.88E-15 *** |
| XLW-MLL07 | 3 | 1.44E-12** | YLG-MLL07 | 2 | 2.15E-06 ** |
| XLW-MLL08 | 3 | 1.42E-10* | YLG-MLL08 | 3 | 3.12E-04ns |
| XLW-MLL09 | 2 | 3.22E-11* | YLG-MLL09 | 3 | 9.62E-09 *** |
| XLW-MLL10 | 2 | 4.58E-06ns | YLG-MLL10 | 2 | 2.23E-05 * |
| XLW-MLL11 | 2 | 1.00E-07ns | YLG-MLL11 | 2 | 2.73E-05 * |
| XLW-MLL12 | 2 | 4.47E-12** | YLG-MLL12 | 2 | 6.24E-05 * |
| XLW-MLL13 | 2 | 2.44E-08ns | YLG-MLL13 | 2 | 0.036ns |
| XLW-MLL14 | 3 | 6.66E-16*** | YLG-MLL14 | 4 | 3.41E-09 *** |
| XLW-MLL15 | 3 | 8.88E-16*** | YLG-MLL15 | 3 | 4.13E-04ns |
| XLW-MLL16 | 2 | 2.62E-08ns | YLG-MLL16 | 4 | 1.16E-04* |
| XLW-MLL17 | 2 | 2.72E-13** | YLG-MLL17 | 7 | 3.50E-10 *** |
| XLW-MLL18 | 4 | 0.00*** | YLG-MLL18 | 5 | 4.89E-12 *** |
| XLW-MLL19 | 3 | 7.77E-16*** | YLG-MLL19 | 2 | 3.27E-04ns |
| XLW-MLL20 | 2 | 5.26E-11* | YLG-MLL20 | 3 | 4.63E-04ns |
| XLW-MLL21 | 2 | 2.27E-12** | YLG-MLL21 | 3 | 3.87E-05 * |
| XLW-MLL22 | 2 | 4.16E-13** | YLG-MLL22 | 2 | 9.8E-05 * |
| XLW-MLL23 | 2 | 7.12E-14*** | YLG-MLL23 | 3 | 4.29E-07 ** |
| XLW-MLL24 | 2 | 3.21E-10* | YLG-MLL24 | 2 | 5.92E-05 * |
| XLW-MLL25 | 7 | 2.00E-15*** | YLG-MLL25 | 2 | 3.60E-04ns |
| XLW-MLL26 | 2 | 5.11E-15*** | YLG-MLL26 | 2 | 1.04E-04 * |
| N | 200 | | YLG-MLL27 | 2 | 1.21E-03ns |
| G | 160 | | YLG-MLL28 | 3 | 1.04E-08 *** |
| Pd | 0.800 | | YLG-MLL29 | 5 | 6.43E-09 *** |
|  |  |  | YLG-MLL30 | 4 | 2.76E-06 ** |
|  |  |  | YLG-MLL31 | 2 | 9.42E-05 * |
|  |  |  | YLG-MLL32 | 3 | 7.98E-09 *** |
|  |  |  | YLG-MLL33 | 2 | 1.49E-06 ** |
|  |  |  | YLG-MLL34 | 2 | 5.04E-04 ns |
|  |  |  | YLG-MLL35 | 2 | 5.36E-05 * |
|  |  |  | YLG-MLL36 | 2 | 7.86E-05 * |
|  |  |  | N | 229 | |
|  |  |  | G | 160 | |
|  |  |  | Pd | 0.699 | |

Name (two populations) and sample size (n) for each MLG; *P*sex, the probability that the MLG occurred at least n times under the assumption of random mating is given for each recurrent MLG.

Total sample size (N), total number of MLGs (G) and genetic diversity Pd (G ⁄ N) are given for each population.

ns P value of Psex is not significant

***P value of Psex < 0.001.

**P value of Psex < 0.01.

*P value of Psex < 0.05.

Table S3. Results of bottleneck test at two populations under two-phased model of mutation (TPM) and stepwise mutation model (SMM) based on randomly collected samples. Wilcoxon sign-rank test (P for H excess and deficiency) was used.

| Population | TPM | SMM |
| --- | --- | --- |
| Xialongwei | 0.6406 | 0.3125 |
| Yingluo | **0.0391*** | **0.0273*** |
